# Supplementary material
Source: publisher figshare collection journal article supplement (https://acs.figshare.com/ndownloader/files/4092889)
Supplement: Supplementary file 1 [file 4092889]

## Supporting Information

# Super-Resolution Mapping of Reactive Sites on Titania-Based Nanoparticles with Water-Soluble Fluorogenic Probes

*Takashi Tachikawa,\* Tomoyuki Yonezawa, and Tetsuro Majima\**

The Institute of Scientific and Industrial Research (SANKEN), Osaka University, Mihogaoka 8-1,  
Ibaraki, Osaka 567-0047, Japan

tachi45@sanken.osaka-u.ac.jp (T.T.); majima@sanken.osaka-u.ac.jp (T.M.)

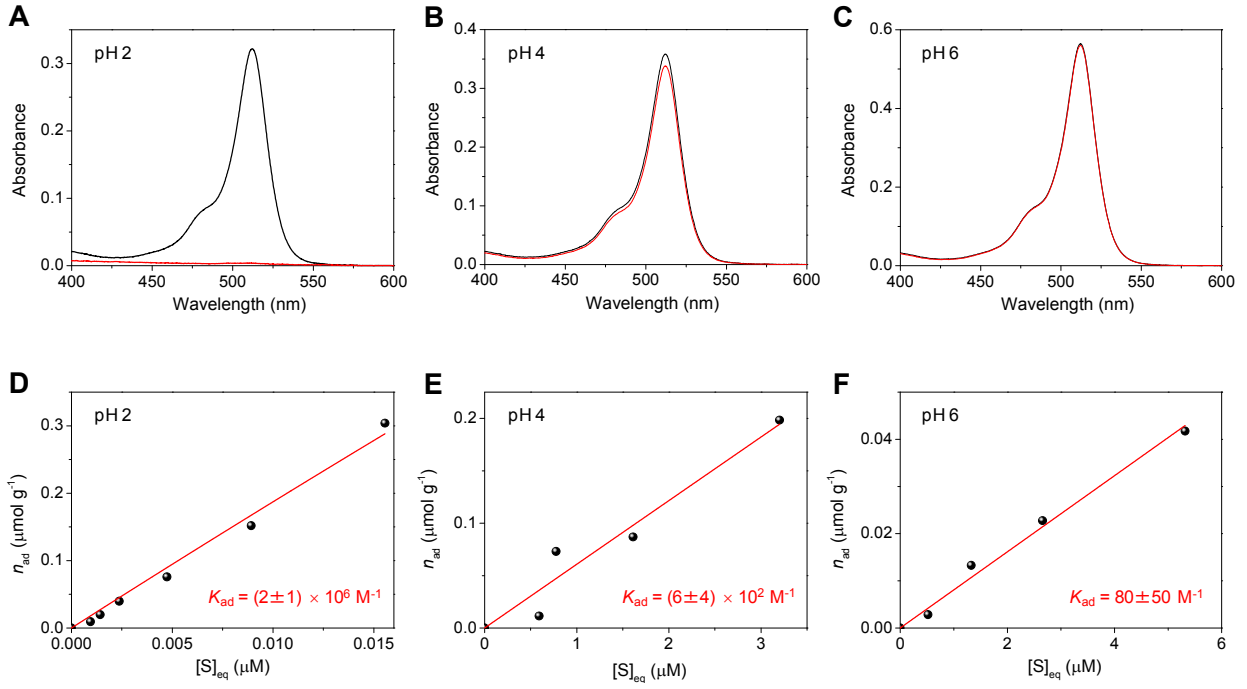

**Figure S1.** (A-C) UV-visible absorption spectra of DS-DN-BODIPY in aqueous methanol (black lines) and in aqueous methanol after reaching adsorption equilibrium with the surface of TiO<sub>2</sub> nanoparticles (Ishihara Sangyo, ST-01; pure anatase, 7 nm particle size) (red lines), respectively. The pH values of added water (10 vol%) are 2 (A), 4 (B), and 6 (C). (D-F)

Langmuir adsorption plots. According to the Langmuir adsorption model,  $n_{ad}$  can be expressed by the following equation,

$$n_{ad} = \frac{K_{ad}[S]_{eq}}{1 + K_{ad}[S]_{eq}} \times n_S \quad (S1)$$

where  $n_S$  is the total number of adsorption sites and  $K_{ad}$  is the equilibrium constant of adsorption. See ref. S1 for experimental procedures. The red lines are the best fits obtained by the calculations based on eq S1.

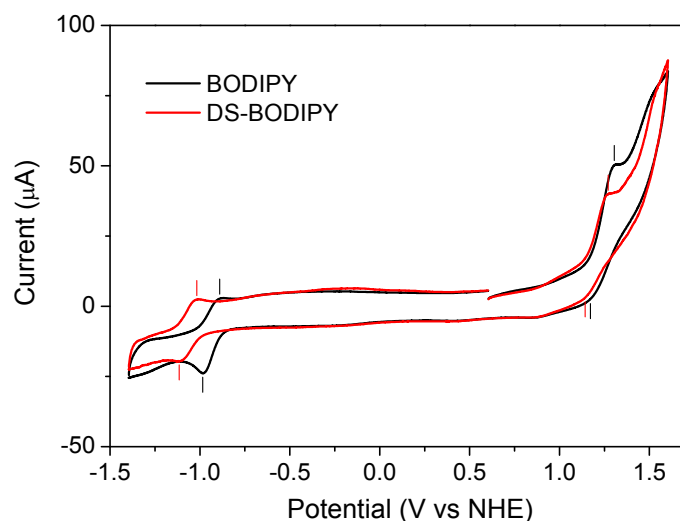

**Figure S2.** Cyclic voltammograms of electrolyte solutions (0.1 M TBATFB in DMF) containing 4,4-difluoro-1,3,5,7-tetramethyl-4-bora-3a,4a-diaza-*s*-indacene (BODIPY) (Invitrogen, D3921) (0.5 mM) and 4,4-difluoro-1,3,5,7,8-pentamethyl-4-bora-3a,4a-diaza-*s*-indacene-2,6-disulfonic acid (DS-BODIPY) (Invitrogen, D-3238) (0.5 mM). Cyclic voltammetry experiments were carried out at room temperature using an electrochemical analyzer (ALS, model 660A) with a standard three-electrode configuration, which was composed of a Pt working electrode, a Pt wire counter electrode, and an Ag/Ag<sup>+</sup> non-aqueous reference electrode. Sample solutions were prepared by dissolving the substrates in *N,N*-dimethylformamide (DMF) containing 0.1 M tetrabutylammonium tetrafluoroborate (TBATFB) as the electrolyte. All potentials were calibrated using ferrocene (Fc) (1.0 mM) as an internal standard (+0.677 V vs NHE for the Fc<sup>+</sup>/Fc couple).<sup>S2</sup>

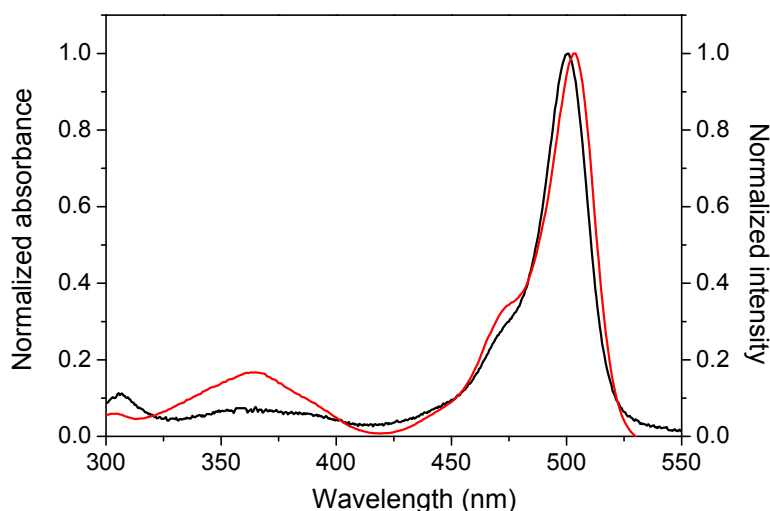

**Figure S3.** Excitation spectrum (red) of methanol solutions of DS-DN-BODIPY after UV irradiation of TiO<sub>2</sub> (emission collected at 540 nm) and UV–visible absorption spectrum (black) of the purified fluorescent product.

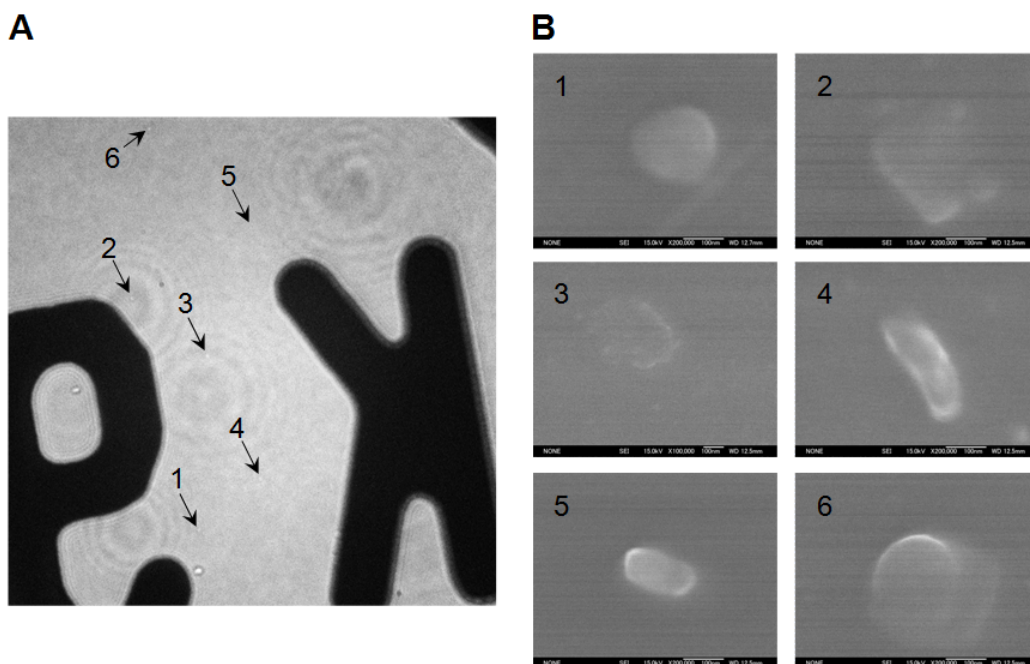

**Figure S4.** Comparison of optical transmission (A) and SEM (B) images of A-100 TiO<sub>2</sub> nanoparticles immobilized on the cover glass.

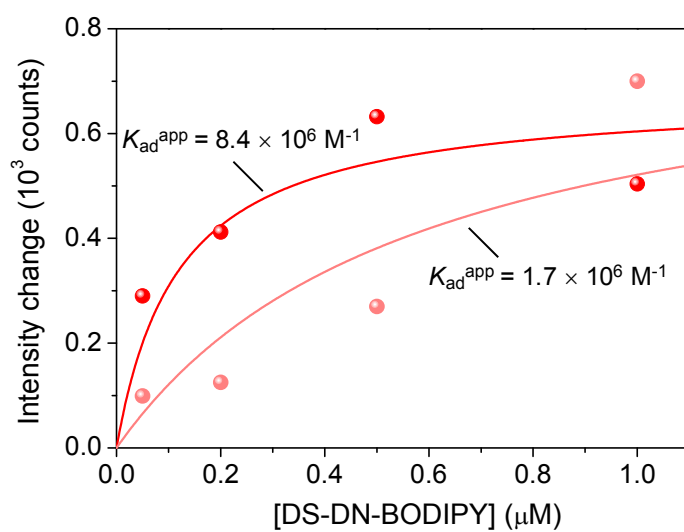

**Figure S5.** DS-DN-BODIPY concentration dependence of fluorescence intensity obtained for different Au/TiO<sub>2</sub> particles. The solid lines were obtained from eq 1 in the main text.

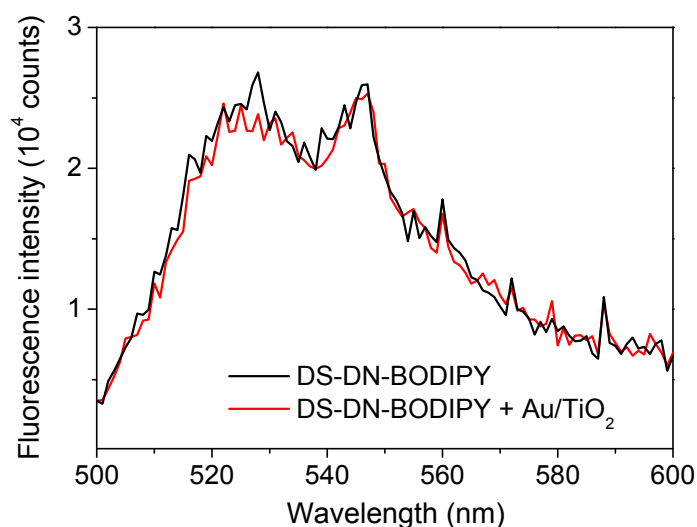

**Figure S6.** Fluorescence spectra of the DS-DN-BODIPY (1  $\mu$ M) aqueous methanol solutions in the absence (black) and presence (red) of 8-nm Au/TiO<sub>2</sub>. The emission peaks at around 545 nm are due to the light scattering from the samples.

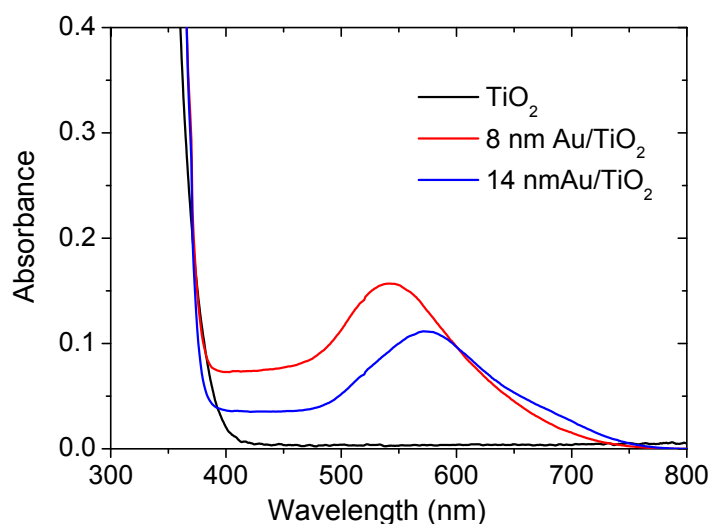

**Figure S7.** Diffuse reflectance spectra of TiO<sub>2</sub> (Ishihara Sangyo, A-100) and Au/TiO<sub>2</sub> measured with UV–visible–NIR spectrophotometer (Jasco V-570). The data are adapted from ref S3.

## References.

- S1. Tachikawa, T.; Tojo, S.; Fujitsuka, M.; Sekino, T.; Majima, T. Photoinduced Charge Separation in Titania Nanotubes. *J. Phys. Chem. B* **2006**, *110*, 14055–14059.
- S2. Bao, D.; Millare, B.; Xia, W.; Steyer, B. G.; Gerasimenko, A. A.; Ferreira, A.; Contreras A.; Vullev, V. I. Electrochemical Oxidation of Ferrocene: A Strong Dependence on the Concentration of the Supporting Electrolyte for Nonpolar Solvents. *J. Phys. Chem. A* **2009**, *113*, 1259–1267.
- S3. Wang, N.; Tachikawa, T.; Majima, T. Single-Molecule, Single-Particle Observation of Size-Dependent Photocatalytic Activity in Au/TiO<sub>2</sub> Nanocomposites. *Chem. Sci.* **2011**, *2*, 891–900.
